# Supplementary material for: Nuclear factor κB–inducing kinase activation as a mechanism of pancreatic β cell failure in obesity
Source: PubMed Central journal article supplement — J Exp Med. 2015 Jul 27;212(8):1239–54. doi: 10.1084/jem.20150218 (PMC4516791; doi:10.1084/jem.20150218), 2015-07-27
Supplement: supp_jem.20150218_JEM_20150218_sm.pdf [file supp_jem.20150218_JEM_20150218_sm.pdf]

## SUPPLEMENTAL MATERIAL

Malle et al., <http://www.jem.org/cgi/content/full/jem.20150218/DC1>**Table S1.** Differentially expressed genes in  $\beta$ TRAF2 and  $\beta$ TRAF3 islets (chow and DIO)

| Gene <sup>a</sup>                                                                           | Log FC <sup>b</sup> |                    |                   |                   | Associated function <sup>c</sup>                                                                                                         |
|---------------------------------------------------------------------------------------------|---------------------|--------------------|-------------------|-------------------|------------------------------------------------------------------------------------------------------------------------------------------|
|                                                                                             | $\beta$ TRAF2 chow  | $\beta$ TRAF3 chow | $\beta$ TRAF2 DIO | $\beta$ TRAF3 DIO |                                                                                                                                          |
| <i>Tph1</i> (tryptophan hydroxylase)                                                        | -                   | -                  | 6.88              | 6.33              | aromatic amino acid family metabolic process, bone remodeling, neuron projection, serotonin synthesis                                    |
| <i>Lrrc55</i> (leucine rich repeat containing 55)                                           | 3.78                | 2.90               | 5.00              | 5.04              | potassium ion transport, BK channel auxiliary subunit                                                                                    |
| <i>Sftpd</i> (surfactant associated protein D)                                              | 3.12                | 2.28               | 4.07              | 3.15              | phospholipid homeostasis, regulation of phagocytosis, LPS binding                                                                        |
| <i>Gbp8</i> (guanylate-binding protein 8)                                                   | 3.16                | -                  | 3.59              | 3.36              | large IFN- $\gamma$ -induced GTPase                                                                                                      |
| <i>Syt10</i> (synaptotagmin X)                                                              | 3.20                | -                  | 3.53              | 3.24              | regulation of Ca <sup>2+</sup> -dependent exocytosis, cytoplasmic vesicle                                                                |
| <i>Crispld2</i> (cysteine-rich secretory protein LCCL domain containing 2)                  | 3.36                | 3.33               | -                 | 2.68              | extracellular matrix (ECM) component, heparin binding, LPS binding, vesicle transport                                                    |
| <i>Hcn1</i> (hyperpolarization-activated, cyclic nucleotide-gated K <sup>+</sup> 1)         | 2.75                | 2.40               | 3.36              | 3.24              | potassium ion transport; voltage-gated potassium channel, sensitivity to cAMP                                                            |
| <i>Fbxw24</i> (F-box and WD-40 domain protein 24)                                           | 2.91                | 1.82               | 3.48              | 2.99              | protein coding gene, unknown function                                                                                                    |
| <i>Tnfrsf11b</i> (tumor necrosis factor receptor superfamily, member 11b (osteoprotegerin)) | -                   | -                  | 3.20              | 3.19              | osteoprotegerin (OPG), ECM organization, regulation of differentiation, negative regulation of bone resorption, decoy receptor for RANKL |
| <i>Matn2</i> (matrilin 2)                                                                   | -                   | -                  | 3.42              | 2.92              | ECM, formation of filamentous networks, neuron cell migration, Ca <sup>2+</sup> -binding,                                                |
| <i>Rerg</i> (RAS-like, estrogen-regulated, growth-inhibitor)                                | 2.13                | 1.56               | 3.30              | 3.04              | RAS superfamily of GTPases, negative regulator of cell growth/proliferation                                                              |
| <i>Rasgrp1</i> (RAS guanyl releasing protein 1)                                             | 3.16                | 3.07               | -                 | 2.93              | GEF activity: activation of Ras and Rho GTPases, Ca <sup>2+</sup> binding                                                                |
| <i>Fmo1</i> (flavin containing monooxygenase 1)                                             | -                   | -                  | 3.16              | 2.55              | drug metabolic process; oxidation-reduction process; NADPH oxidation; organic acid metabolic process                                     |
| <i>Grem2</i> (gremlin 2 homolog, cysteine knot superfamily ( <i>Xenopus laevis</i> ))       | 2.19                | 1.49               | 2.54              | 2.28              | regulator of osteoblast differentiation and osteogenesis; cytokine, heparin binding, negative regulation of BMP signaling pathway        |
| <i>Gbp4</i> (guanylate binding protein 4)                                                   | 2.29                | 2.44               | -                 | -                 | large IFN $\gamma$ -induced GTPase negative regulation of protein ubiquitination                                                         |
| <i>Krtap13-1</i> (keratin associated protein 13-1)                                          | 2.57                | 1.96               | -                 | 2.26              | intermediate filament                                                                                                                    |
| <i>Gbp10</i> (guanylate-binding protein 10)                                                 | 1.70                | 2.73               | -                 | -                 | large IFN $\gamma$ -induced GTPase                                                                                                       |
| <i>Srbd1</i> (S1 RNA binding domain 1)                                                      | 1.74                | -                  | 2.34              | 2.05              | nucleobase-containing compound metabolic process, hydrolase activity, nucleic acid binding                                               |
| <i>Gpr110</i> (G protein-coupled receptor 110)                                              | -                   | -                  | 2.61              | 1.74              | adhesion GPCR                                                                                                                            |
| <i>Fam69a</i> (family with sequence similarity 69, member A)                                | 2.06                | 2.20               | -                 | -                 | ER associated, transmembrane, Ca <sup>2+</sup> dependent (suspected)                                                                     |
| <i>Gfra3</i> (glial cell line derived neurotrophic factor family receptor alpha 3)          | 2.41                | 1.57               | 2.24              | 1.84              | neuron development, embryonic development, apoptosis, artemin receptor                                                                   |

**Table S1.** Differentially expressed genes in  $\beta$ TRAF2 and  $\beta$ TRAF3 islets (chow and DIO) (Continued)

| Gene <sup>a</sup>                                                                          | Log FC <sup>b</sup> |                    |                   |                   | Associated function <sup>c</sup>                                                                                                        |
|--------------------------------------------------------------------------------------------|---------------------|--------------------|-------------------|-------------------|-----------------------------------------------------------------------------------------------------------------------------------------|
|                                                                                            | $\beta$ TRAF2 chow  | $\beta$ TRAF3 chow | $\beta$ TRAF2 DIO | $\beta$ TRAF3 DIO |                                                                                                                                         |
| <i>Adarb2</i> (adenosine deaminase, RNA-specific, B2)                                      |                     |                    | 2.23              | 1.81              | RED2, RNA-editing deaminase                                                                                                             |
| <i>Tnfrsf9</i> (tumor necrosis factor receptor superfamily, member 9)                      | 2.05                | 1.93               | -                 | -                 | 4-1BB, negative regulation of IL10 and IL12 secretion                                                                                   |
| <i>Gpr126</i> (G protein-coupled receptor 126)                                             | 2.29                | 1.45               | 2.06              | 1.85              | signal transduction, heart development, mitochondrial function                                                                          |
| <i>Tmem47</i> (transmembrane protein 47)                                                   | 1.91                | -                  | 2.05              | 1.86              | cell-cell junction                                                                                                                      |
| <i>B3galt1</i> (UDP-Gal: betaGlcNAc beta 1,3-galactosyltransferase, polypeptide 1)         | -                   | -                  | 1.90              | 1.93              | globo-series glycosphingolipid synthesis                                                                                                |
| <i>Myo3a</i> (myosin IIIA)                                                                 | -                   | -                  | 2.13              | 1.70              | actin filament binding, microfilament motor activity, actin -dependent ATPase activity, S/T phosphorylation, actin catabolic process    |
| <i>Rph3a</i> (rabphilin 3A)                                                                | -                   | -                  | 1.97              | 1.81              | calcium-dependent phospholipid binding, secretory granule associated                                                                    |
| <i>Dnahc8</i> (dynein, axonemal, heavy chain 8)                                            | -                   | -                  | 1.95              | 1.83              | microtubule-associated; motor activity                                                                                                  |
| <i>Mapk4</i> (mitogen-activated protein kinase 4)                                          | 1.92                | 1.83               | -                 | 1.23              | ERK4, kinase activity                                                                                                                   |
| <i>Pde7b</i> (phosphodiesterase 7B)                                                        | -                   | -                  | 1.90              | 1.78              | metabolic process, 3',5'-cyclic-AMP phosphodiesterase activity (cAMP to AMP)                                                            |
| <i>Kcnj5</i> (potassium inwardly rectifying channel, subfamily J, member 5)                | 1.81                | -                  | 1.89              | 1.80              | potassium ion transport                                                                                                                 |
| <i>Cym</i> (chymosin)                                                                      | -                   | -                  | 1.87              | 1.45              | peptidase                                                                                                                               |
| <i>Gm15577</i> (predicted gene 15577)                                                      | 1.68                | 1.17               | 1.68              | -                 | unclassified gene                                                                                                                       |
| <i>Kcnk10</i> (potassium channel, subfamily K, member 10)                                  | 1.72                | 1.27               | 1.94              | 1.85              | potassium ion transmembrane transport                                                                                                   |
| <i>Penk</i> (preproenkephalin)                                                             | 1.47                | 1.12               | 1.60              | -                 | neuropeptide signaling pathway, opioid peptide activity                                                                                 |
| <i>Slc2a13</i> (solute carrier family 2 (facilitated glucose transporter), member 13)      | -                   | -                  | 1.45              | 1.31              |                                                                                                                                         |
| <i>Tmem2</i> (transmembrane protein 2)                                                     | -                   | -                  | 1.34              | 1.35              | multicellular organismal development, extracellular vesicular exosome, morphogenesis                                                    |
| <i>Bcat1</i> (branched chain aminotransferase 1, cytosolic)                                | 1.68                | 1.22               | -                 | 1.10              | metabolic process cell proliferation, transaminase: valine, leucine and isoleucine metabolism                                           |
| <i>Ogdhl</i> (oxoglutarate dehydrogenase-like)                                             | 1.45                | 1.20               | -                 | -                 | negative regulator of cell proliferation, modification of AKT/PKB signaling; modification of NF- $\kappa$ B signaling                   |
| <i>Gpr182</i> (G protein-coupled receptor 182)                                             | 1.02                | 1.62               | -                 | -                 | signal transduction, adrenomedullin receptor activity (suspected)                                                                       |
| <i>Igfbp5</i> (insulin-like growth factor binding protein 5)                               | 1.55                | -                  | 1.29              | 1.06              | glucose homeostasis, glucose metabolic process, muscle cell differentiation, regulation of growth, positive regulation of PKB signaling |
| <i>B3galnt1</i> (UDP-GalNAc: betaGlcNAc beta 1,3-galactosaminyltransferase, polypeptide 1) | -                   | -                  | 1.52              | 1.06              | globo-series glycosphingolipid synthesis                                                                                                |

**Table S1.** Differentially expressed genes in  $\beta$ TRAF2 and  $\beta$ TRAF3 islets (chow and DIO) (Continued)

| Gene <sup>a</sup>                                                                           | Log FC <sup>b</sup> |                    |                   |                   | Associated function <sup>c</sup>                                                                                                                                                                                                                                 |
|---------------------------------------------------------------------------------------------|---------------------|--------------------|-------------------|-------------------|------------------------------------------------------------------------------------------------------------------------------------------------------------------------------------------------------------------------------------------------------------------|
|                                                                                             | $\beta$ TRAF2 chow  | $\beta$ TRAF3 chow | $\beta$ TRAF2 DIO | $\beta$ TRAF3 DIO |                                                                                                                                                                                                                                                                  |
| <i>Ngfr</i> (nerve growth factor receptor (TNFR superfamily, member 16))                    | -                   | 1.08               | 1.32              | 1.30              | regulation of cell death, axon guidance, clathrin-coated endocytic vesicle, beta-amyloid binding, ubiquitin protein ligase binding, regulation of reactive oxygen species metabolic process                                                                      |
| <i>Gm19510</i> (predicted gene, 19510)                                                      | 1.35                | 1.11               | -                 | -                 | unclassified non-coding RNA gene                                                                                                                                                                                                                                 |
| <i>Cish</i> (cytokine inducible SH2-containing protein)                                     | 1.23                | -                  | 1.35              | 1.06              | regulation of growth, PKC-activating, SOCS family protein                                                                                                                                                                                                        |
| <i>Prok1</i> (prokineticin 1)                                                               | -                   | -                  | 1.37              | 1.05              | positive regulation of cell proliferation, regulation of angiogenesis, activation of MAPK activity                                                                                                                                                               |
| <i>Ivd</i> (isovaleryl coenzyme A dehydrogenase)                                            | 1.23                | -                  | 1.17              | 1.19              | leucine catabolic process, acyl-CoA dehydrogenase activity, flavin adenine dinucleotide binding                                                                                                                                                                  |
| <i>Socs2</i> (suppressor of cytokine signaling 2)                                           | 1.42                | 1.05               | -                 | 1.05              | positive regulation of differentiation; insulin-like growth factor receptor binding                                                                                                                                                                              |
| <i>Lrp8</i> (low density lipoprotein receptor-related protein 8, apolipoprotein e receptor) | -                   | -                  | 1.09              | 1.23              | positive regulation of CREB transcription factor activity; calcium ion binding                                                                                                                                                                                   |
| <i>Wipi1</i> (WD repeat domain, phosphoinositide interacting 1)                             | 1.21                | 1.05               | -                 | -                 | autophagic vacuole assembly, vesicle targeting, estrogen receptor binding, phosphatidylinositol-3-phosphate binding/GSK3 $\beta$ inhibition                                                                                                                      |
| <i>Adora1</i> (adenosine A1 receptor)                                                       | -1.27               | -1.35              | -                 | -                 | GPCR, lipid catabolic process, MAPKK activation, negative regulation of inflammatory response, negative regulation of cell proliferation adenylyl cyclase inhibitor; positive regulation of K <sup>+</sup> transport, negative regulation of glutamate secretion |

<sup>a</sup>Gene symbol and gene name.

<sup>b</sup>Log-fold change of differential gene expression in chow and DIO  $\beta$ TRAF2 and  $\beta$ TRAF3 islets.

<sup>c</sup>Associated gene function according to DAVID Bioinformatics Database and Mouse Genome Database (MGD) at <http://www.informatics.jax.org> (Sep 2014).
